# Supplementary material
Source: publisher figshare collection journal article supplement (https://tandf.figshare.com/ndownloader/files/39651561)
Supplement: Supplementary file 1 [file 39651561]

Supplemental Material - Neuropsychiatric ADRs classified according PT Meddra level recorded in clinical records within 12 months from the first dispensing of antiretrovirals, according to the antiretroviral regimen. Belo Horizonte, Brazil (n=433).

| **Neuropsychiatric ADRs** **according**  **PT Meddra level** | **All individuals**  **(n=433)** | | **EFV-based**  **(n=291)** | | **DTG-based**  **(n=142)** | |
| --- | --- | --- | --- | --- | --- | --- |
| **n** | **%** | **n** | **%** | **n** | **%** |
| Dizziness | 50 | 11.55 | 45 | 15.46 | 5 | 3.52 |
| Insomnia | 41 | 9.47 | 36 | 12.37 | 5 | 3.52 |
| Nightmare | 35 | 8.08 | 34 | 11.68 | 1 | 0.70 |
| Headache | 35 | 8.08 | 23 | 7.90 | 12 | 8.45 |
| Somnolence | 21 | 4.85 | 18 | 6.19 | 3 | 2.11 |
| Abnormal dreams | 13 | 3.00 | 13 | 4.47 | 0 | 0.00 |
| Presyncope | 9 | 2.08 | 9 | 3.09 | 0 | 0.00 |
| Anxiety | 7 | 1.62 | 6 | 2.06 | 1 | 0.70 |
| Sleep disorder | 7 | 1.62 | 6 | 2.06 | 1 | 0.70 |
| Irritability | 5 | 1.15 | 4 | 1.37 | 1 | 0.70 |
| Depressed mood | 4 | 0.92 | 4 | 1.37 | 0 | 0.00 |
| Tremor | 4 | 0.92 | 3 | 1.03 | 1 | 0.70 |
| Libido decreased | 3 | 0.69 | 3 | 1.03 | 0 | 0.00 |
| Listless | 3 | 0.69 | 3 | 1.03 | 0 | 0.00 |
| Hallucination | 3 | 0.69 | 3 | 1.03 | 0 | 0.00 |
| Phonophobia | 2 | 0.46 | 2 | 0.69 | 0 | 0.00 |
| Panic attack | 2 | 0.46 | 2 | 0.69 | 0 | 0.00 |
| Mood altered | 2 | 0.46 | 2 | 0.69 | 0 | 0.00 |
| Poor quality sleep | 2 | 0.46 | 2 | 0.69 | 0 | 0.00 |
| Taste disorder | 2 | 0.46 | 2 | 0.69 | 0 | 0.00 |
| Apathy | 2 | 0.46 | 2 | 0.69 | 0 | 0.00 |
| Paraesthesia | 2 | 0.46 | 2 | 0.69 | 0 | 0.00 |
| Disturbance in attention | 2 | 0.46 | 2 | 0.69 | 0 | 0.00 |
| Agitation | 2 | 0.46 | 2 | 0.69 | 0 | 0.00 |
| Suicidal ideation | 2 | 0.46 | 2 | 0.69 | 0 | 0.00 |
| Claustrophobia | 1 | 0.23 | 1 | 0.34 | 0 | 0.00 |
| Dysgeusia | 1 | 0.23 | 0 | 0.00 | 1 | 0.70 |
| Dizziness postural | 1 | 0.23 | 0 | 0.00 | 1 | 0.70 |
| Middle insomnia | 1 | 0.23 | 1 | 0.34 | 0 | 0.00 |
| Neuropsychiatric symptoms | 1 | 0.23 | 1 | 0.34 | 0 | 0.00 |
| Hallucination, visual | 1 | 0.23 | 1 | 0.34 | 0 | 0.00 |
| Sleep terror | 1 | 0.23 | 1 | 0.34 | 0 | 0.00 |
| Bradyphrenia | 1 | 0.23 | 1 | 0.34 | 0 | 0.00 |
| Depression | 1 | 0.23 | 1 | 0.34 | 0 | 0.00 |
| Mood swings | 1 | 0.23 | 1 | 0.34 | 0 | 0.00 |
| Neurological symptom | 1 | 0.23 | 1 | 0.34 | 0 | 0.00 |
| Nervousness | 1 | 0.23 | 1 | 0.34 | 0 | 0.00 |
| Hypoesthesia | 1 | 0.23 | 1 | 0.34 | 0 | 0.00 |
| Premature ejaculation | 1 | 0.23 | 1 | 0.34 | 0 | 0.00 |
| Antisocial behaviour | 1 | 0.23 | 1 | 0.34 | 0 | 0.00 |
| Paraesthesia oral | 1 | 0.23 | 1 | 0.34 | 0 | 0.00 |
| Memory impairment | 1 | 0.23 | 1 | 0.34 | 0 | 0.00 |
| Loss of libido | 1 | 0.23 | 1 | 0.34 | 0 | 0.00 |
| Attention deficit hyperactivity disorder | 1 | 0.23 | 1 | 0.34 | 0 | 0.00 |
| Confusional state | 1 | 0.23 | 1 | 0.34 | 0 | 0.00 |
| Amnesia | 1 | 0.23 | 0 | 0.00 | 1 | 0.70 |
| Hypersomnia | 1 | 0.23 | 1 | 0.34 | 0 | 0.00 |
